# Supplementary material for: Aerosol inhalation exposure study of respiratory toxicity induced by 20 nm anatase titanium dioxide nanoparticles
Source: Royal Society of Chemistry journal article supplement (doi:10.1039/c4tx00040d), 2014-06-19
Supplement: c4tx00040d1.pdf [file c4tx00040d1.pdf]

## **Aerosol Inhalation Exposure Study of Respiratory Toxicity Induced by 20nm Anatase Titanium Dioxide Nanoparticles**

Jilei Yin<sup>a,b</sup>, Cheng Kang<sup>a</sup>, Yufeng Li<sup>a,d</sup>, Qinnuan Li<sup>a,\*</sup>, Xiaoyong Zhang<sup>a,c,\*</sup>, Wenxin Li<sup>a</sup>

<sup>a</sup> Shanghai Institute of Applied Physics, Chinese Academy of Sciences, Shanghai 201800, China. <sup>b</sup>Jiangsu Union Technical Institute Lianyungang Branch Institute of TCM, Lianyungang 222006, China. <sup>c</sup> Department of Chemistry/Institute of Polymers, Nanchang University, 999 Xuefu Avenue, Nanchang 330031, China. <sup>d</sup> Shanghai Pharmaceuticals Holding Co., Ltd.

## Results and Discussion

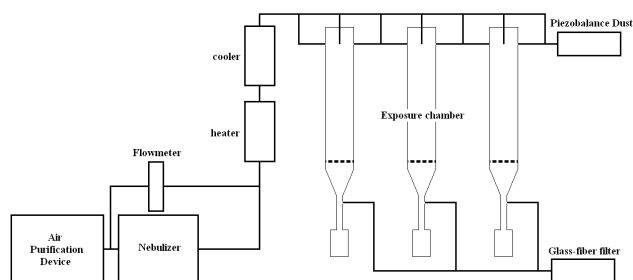

**Fig. S1** The aerosol inhalation exposure system.

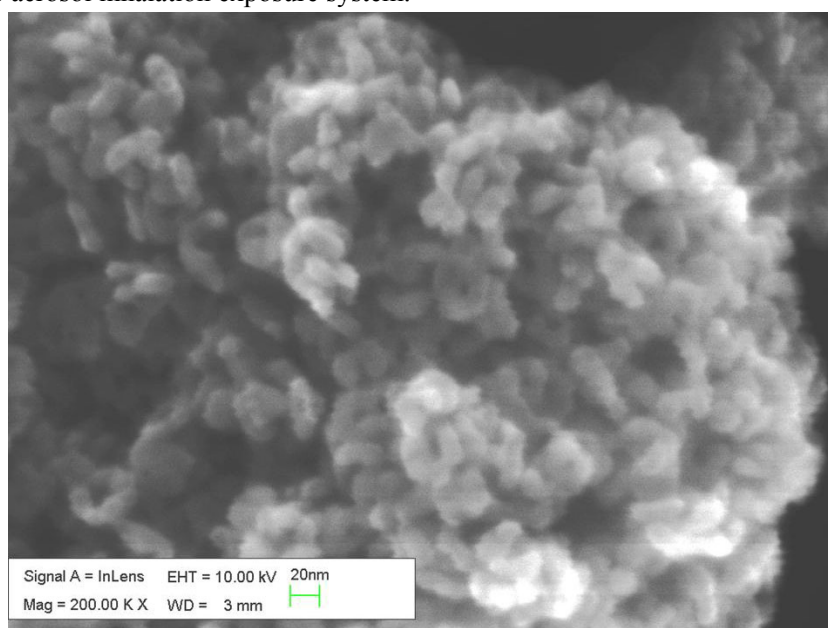

**Fig. S2** The physicochemical characteristics of TiO<sub>2</sub> nanoparticles with a primary particle size of 20 nm, sclar bar = 20 nm (green line).

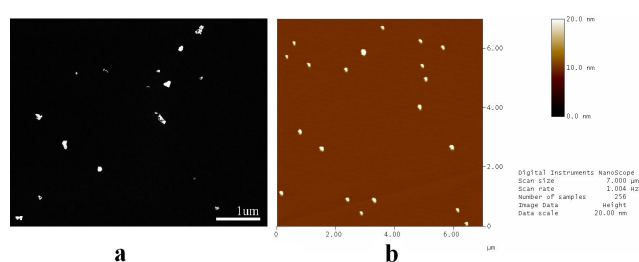

**Fig. S3** The aerosol size of TiO<sub>2</sub> nanoparticles suspended in millipore ultrapure water. (a) The SEM image of TiO<sub>2</sub> nanoparticle aerosol; (b) The AFM image of TiO<sub>2</sub> nanoparticle aerosol.

**Tab. S1** Results of the concentration of total protein, ACP and AKP in BALF (average ± stdev) after mice exposed to TiO<sub>2</sub> nanoparticles (n=5).

|                     | Control group | Inhalation exposure group |
|---------------------|---------------|---------------------------|
| Total Protein (g/L) | 0.19 ± 0.04   | 0.27 ± 0.04               |
| ACP (U/gprot)       | 18.80 ± 5.24  | 18.13 ± 7.66              |
| AKP (U/gprot)       | 6.63 ± 0.77   | 7.32 ± 0.40               |

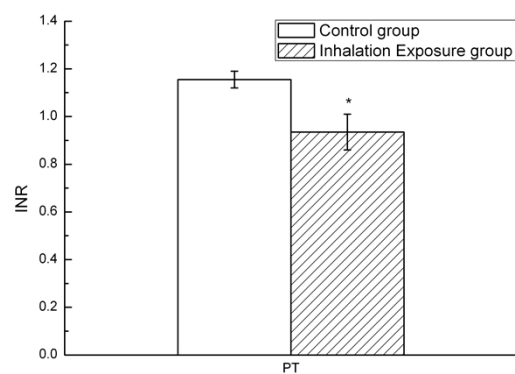

**Fig. S4** Results of PT after mice exposed to TiO<sub>2</sub> nanoparticles.
